# Supplementary material for: The Mechanism of Ubiquitination in the Cullin-RING E3 Ligase Machinery: Conformational Control of Substrate Orientation
Source: PLoS Comput Biol. 2009 Oct 2;5(10):e1000527. doi: 10.1371/journal.pcbi.1000527 (PMC2741574; doi:10.1371/journal.pcbi.1000527)
Supplement: Figure S6 — Sequence alignment of (A) VHL-box, SOCS-box and (B) F-box proteins. (0.10 MB PDF) [file pcbi.1000527.s006.pdf]

|               |           | linker      | VHL-box or SOCS-box                                                             |  |
|---------------|-----------|-------------|---------------------------------------------------------------------------------|--|
| pVHL_cattle   | - F A N I | T L P V Y T | L K E R C L Q V V R S L V K P E D Y R R L D I V R S L Y E D L E D H P N - - -   |  |
| pVHL_mouse    | - F A N I | T L P V Y T | L K E R C L Q V V R S L V K P E N Y R R L D I V R S L Y E D L E D Y P S - - -   |  |
| pVHL_frog     | - L V N I | S L P V F S | L K E R C L Q V V R S L V K P E D Y R K L E I V V S L Y E D L E N R P D - - -   |  |
| SOCS2_dog     | - - - Y T | S A P - - P | L Q H L C R L T I N K C T G - - T I W G L P L P T R L K D Y L E E Y K F - - -   |  |
| SOCS2_mouse   | - - - Y T | S A P - - T | L Q H F C R L A I N K C T G - - T I W G L P L P T R L K D Y L E E Y K F - - -   |  |
| SOCS2_chicken | - G R R D | S I P - - S | L Q H L C R L R I N R C T T - - E V E R L P L P R R M G D Y L K Q Y P F - - -   |  |
| SOCS4_mouse   | T P L I R | T F P F - S | L Q H I C R T V I C N C T T Y D G I D A L P I P S P M K L Y L K E Y H Y K S K V |  |
| SOCS4_frog    | S P L N R | T F P F - T | L Q H I C R A A I C T S T N Y D G I D A L P V P S S M K L Y L K E Y H Y K S K V |  |
| SOCS5_mouse   | I S L N R | T F P F - S | L Q Y I C R A V I C R C T T Y D G I D G L P L P S M L Q D F L K E Y H Y K Q K V |  |
| SOCS5_human   | I S L N R | T F P F - S | L Q Y I C R A V I C R C T T Y D G I D G L P L P S M L Q D F L K E Y H Y K Q K V |  |
| SOCS6_Pongo   | T P L I R | T F P F - S | L Q H I C R T V I C N C T T Y D G I D A L P I P S S M K L Y L K E Y H Y K S K V |  |
| SOCS8_fish    | - H R R E | G F P - - S | L Q H I A R L T I N K Q T N - - C P D Q L P L P K P L L D F L Q N Y P F - - -   |  |
| SOCS9_fish    | N P I H R | S O P F - N | L Q H I C R G V I S S C T T Y D G I N V L P I P N T L K K H L K E Y H Y K O R   |  |

[illegible]

**Figure S6.** Sequence alignment of (A) VHL-box, SOCS-box and (B) F-box proteins.
