# Supplementary material for: The Mechanism of Ubiquitination in the Cullin-RING E3 Ligase Machinery: Conformational Control of Substrate Orientation
Source: PubMed Central journal article supplement (PMC2741574; doi:10.1371/journal.pcbi.1000527), 2009-10-02
Supplement: pcbi.1000527.s001.pdf [file pcbi.1000527.s001.pdf]

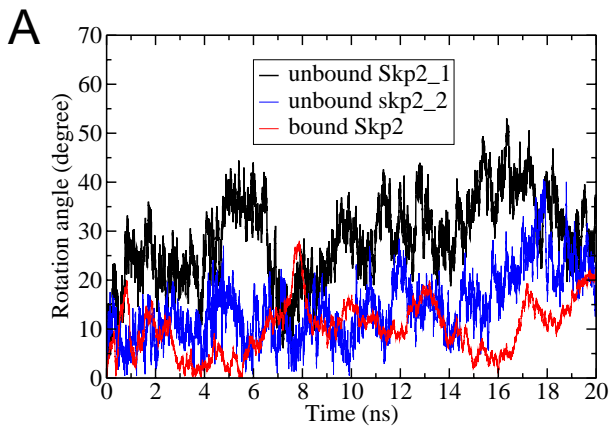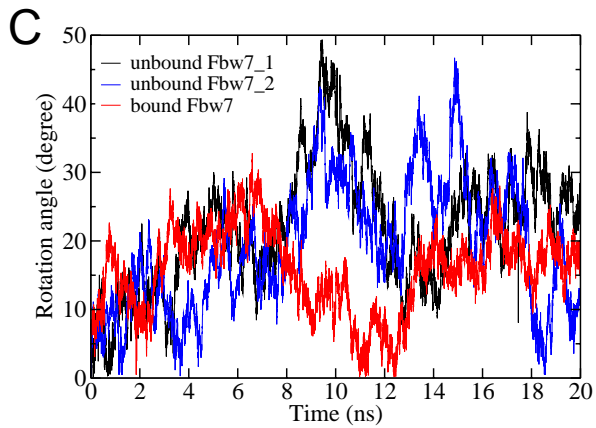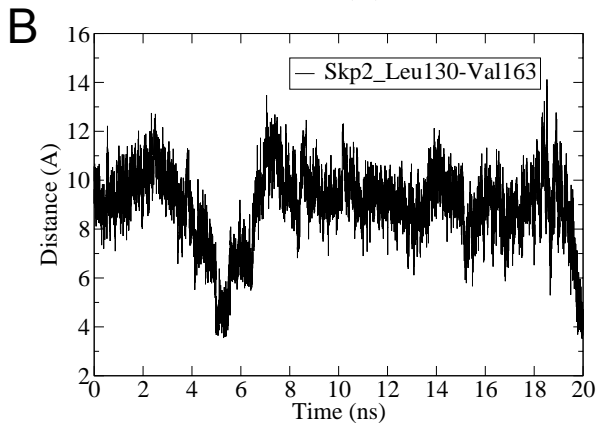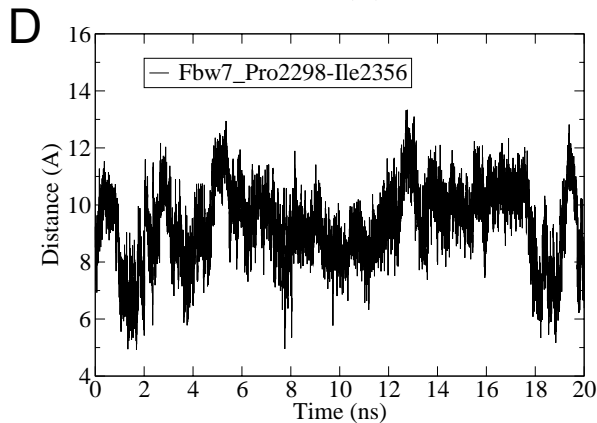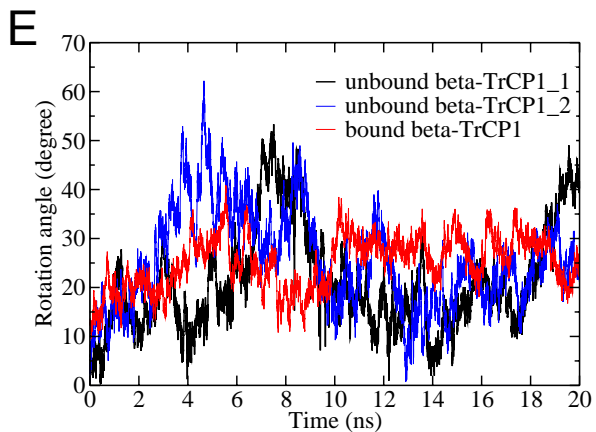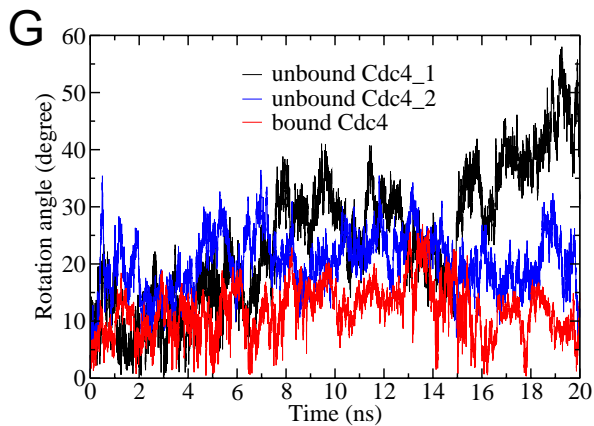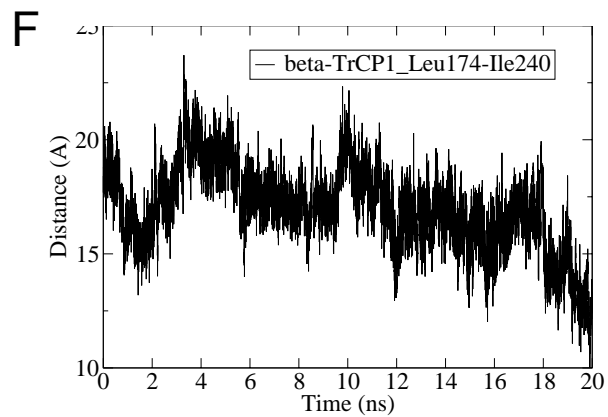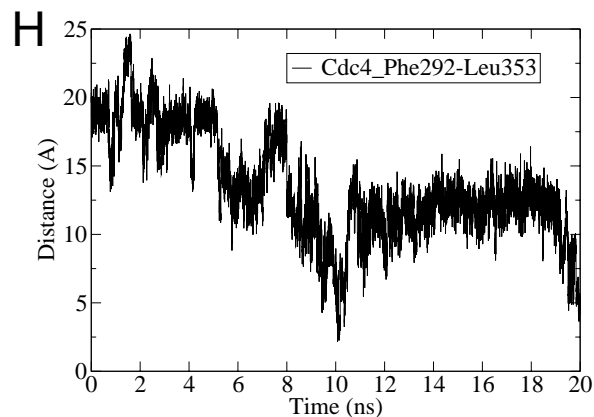

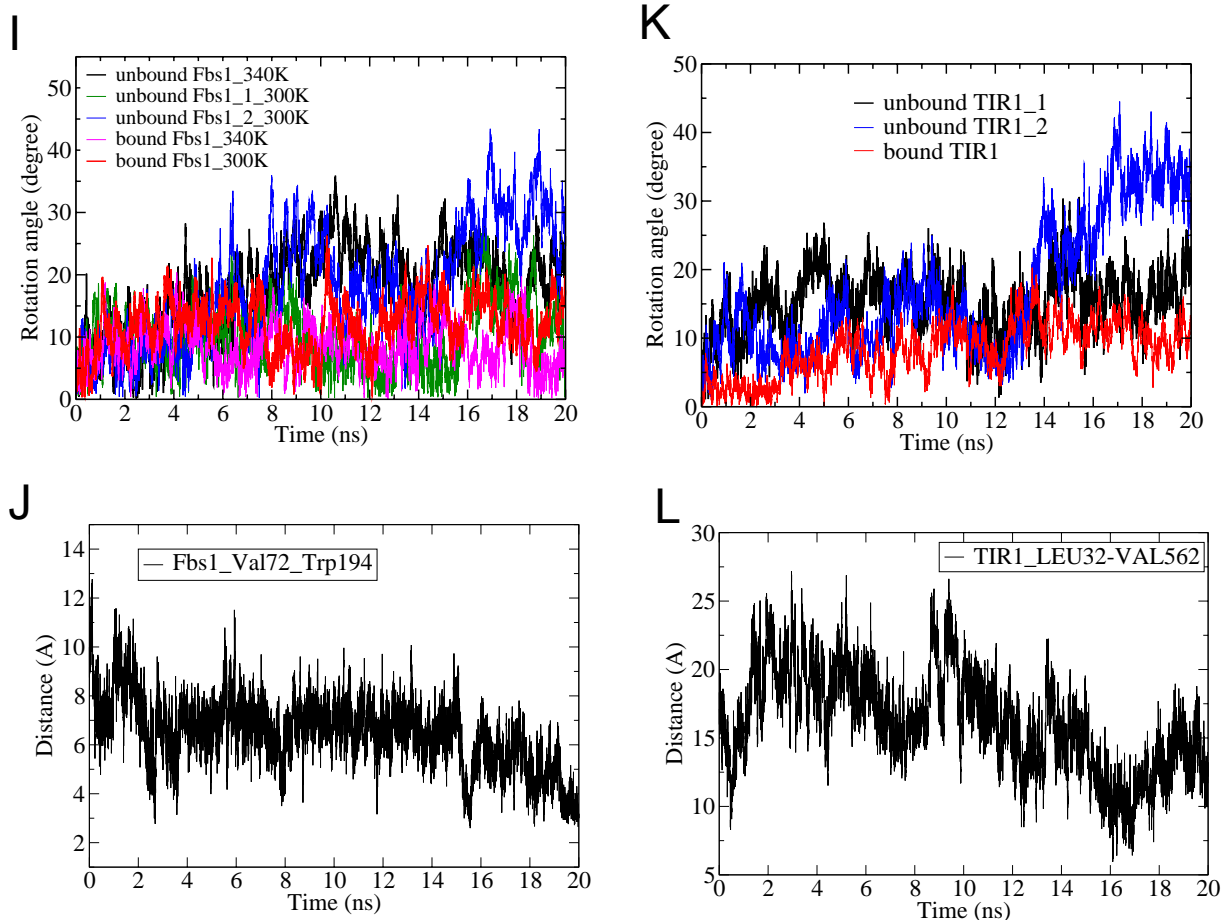

**Figure S1.** Angle rotation graphs of unbound trajectory 1 (black), trajectory 2 (blue) and bound (red) forms for (A) Skp2, (C) Fbw7, (E)  $\beta$ -TrCP1, (G) Cdc4, (I) Fbs1, and (K) TIR1. The graphs of changes in the distances between hydrophobic residues from box domain and linker are shown for the unbound form trajectory 1 of (B) Skp2, (D) Fbw7, (F)  $\beta$ -TrCP1, (H) Cdc4, (J) Fbs1 and (L) TIR1.
