# Supplementary material for: The Mechanism of Ubiquitination in the Cullin-RING E3 Ligase Machinery: Conformational Control of Substrate Orientation
Source: PubMed Central journal article supplement (PMC2741574; doi:10.1371/journal.pcbi.1000527), 2009-10-02
Supplement: pcbi.1000527.s002.pdf [file pcbi.1000527.s002.pdf]

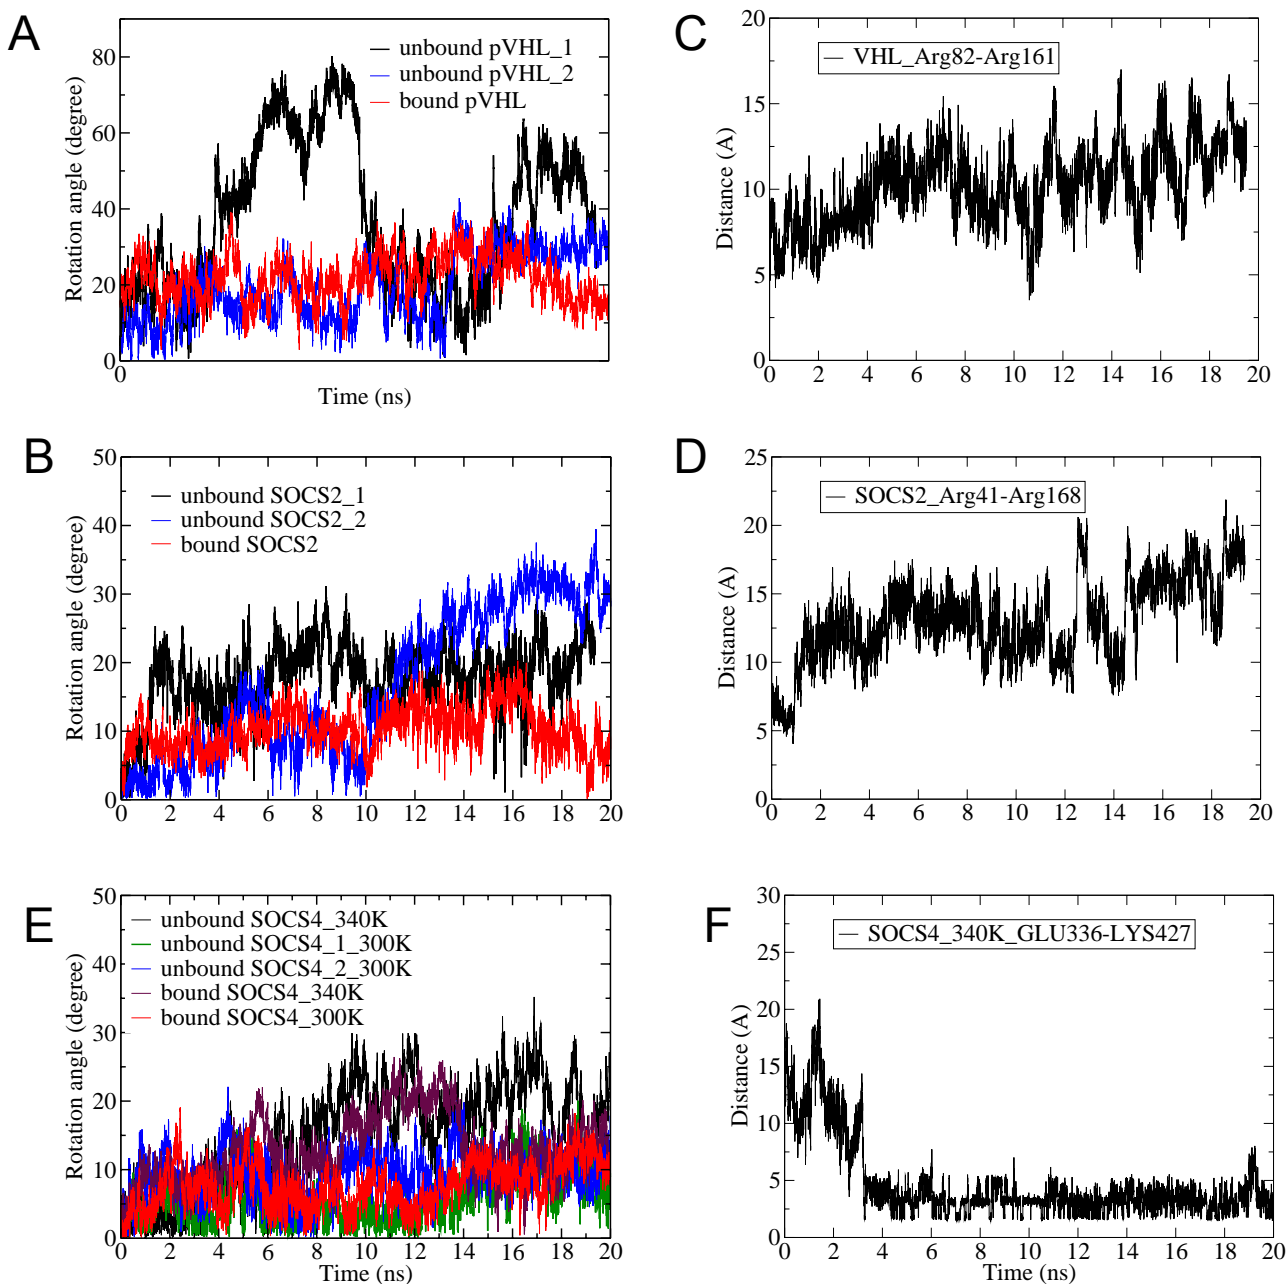

**Figure S2.** Angle rotation graphs of unbound trajectory 1 (black), trajectory 2 (blue) and bound (red) form for (A) pVHL, (C) SOCS2, (E) SOCS4. The graphs of distance changes between the charged residues at the inter-domain interface are shown for the unbound form trajectory 1 of (B) pVHL, (D) SOCS2, (F) SOCS4.
