# Supplementary material for: The Mechanism of Ubiquitination in the Cullin-RING E3 Ligase Machinery: Conformational Control of Substrate Orientation
Source: PubMed Central journal article supplement (PMC2741574; doi:10.1371/journal.pcbi.1000527), 2009-10-02
Supplement: pcbi.1000527.s004.pdf [file pcbi.1000527.s004.pdf]

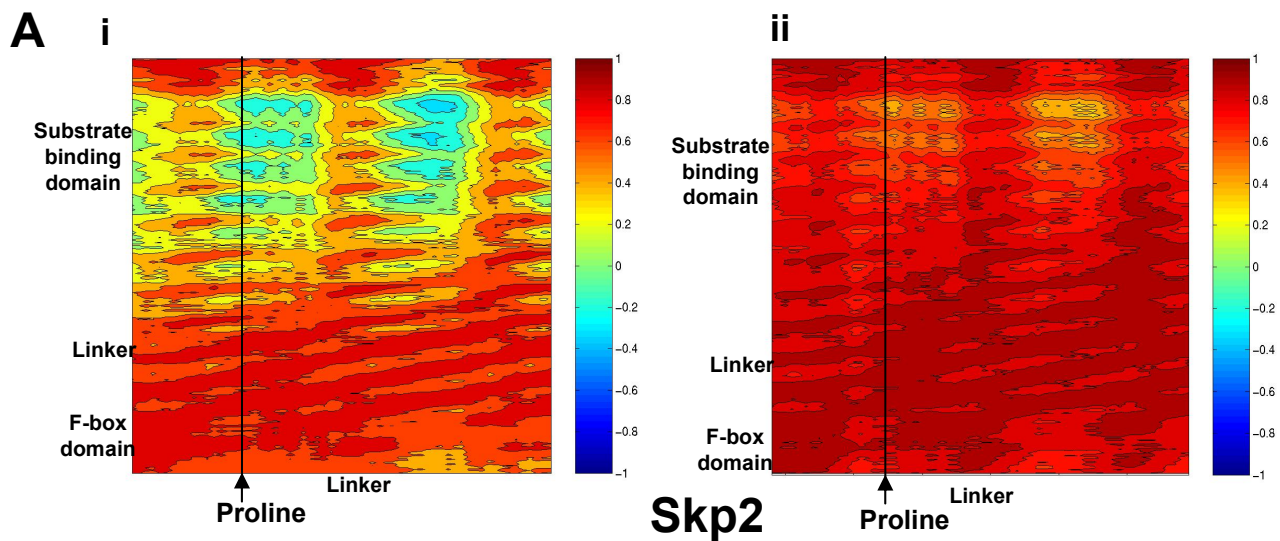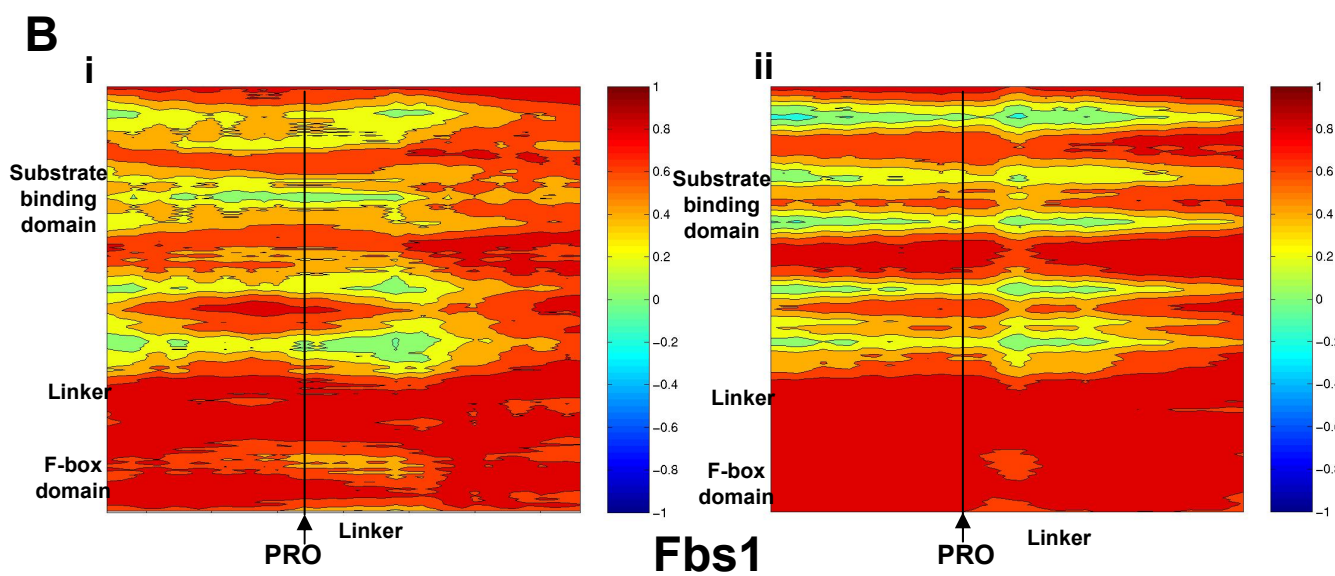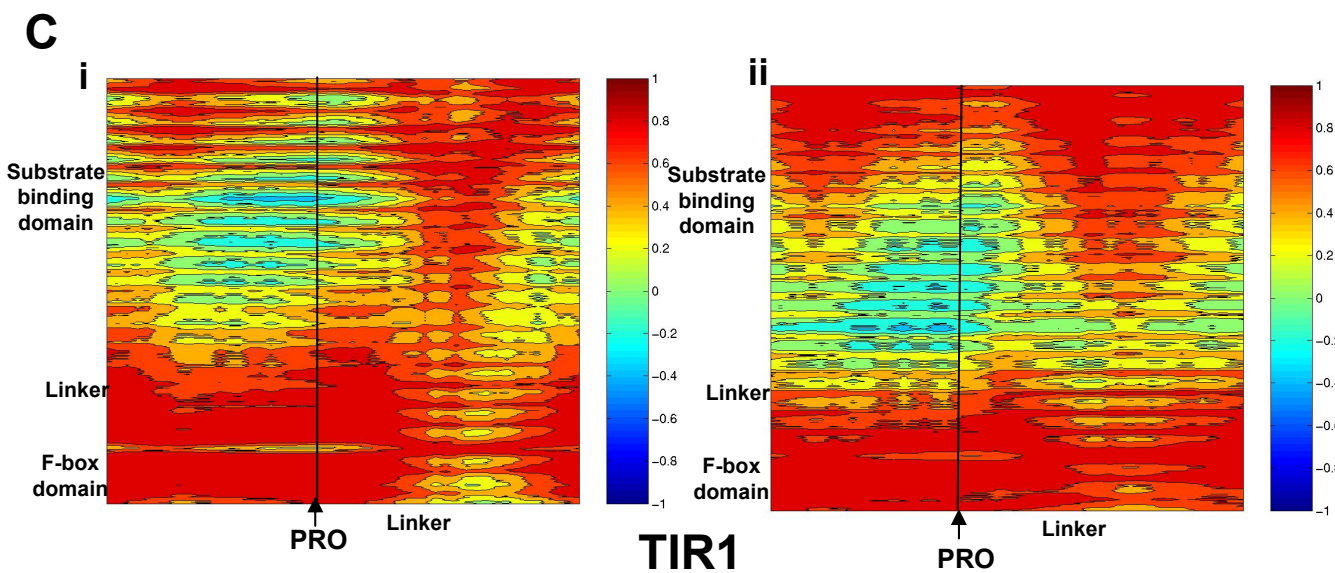

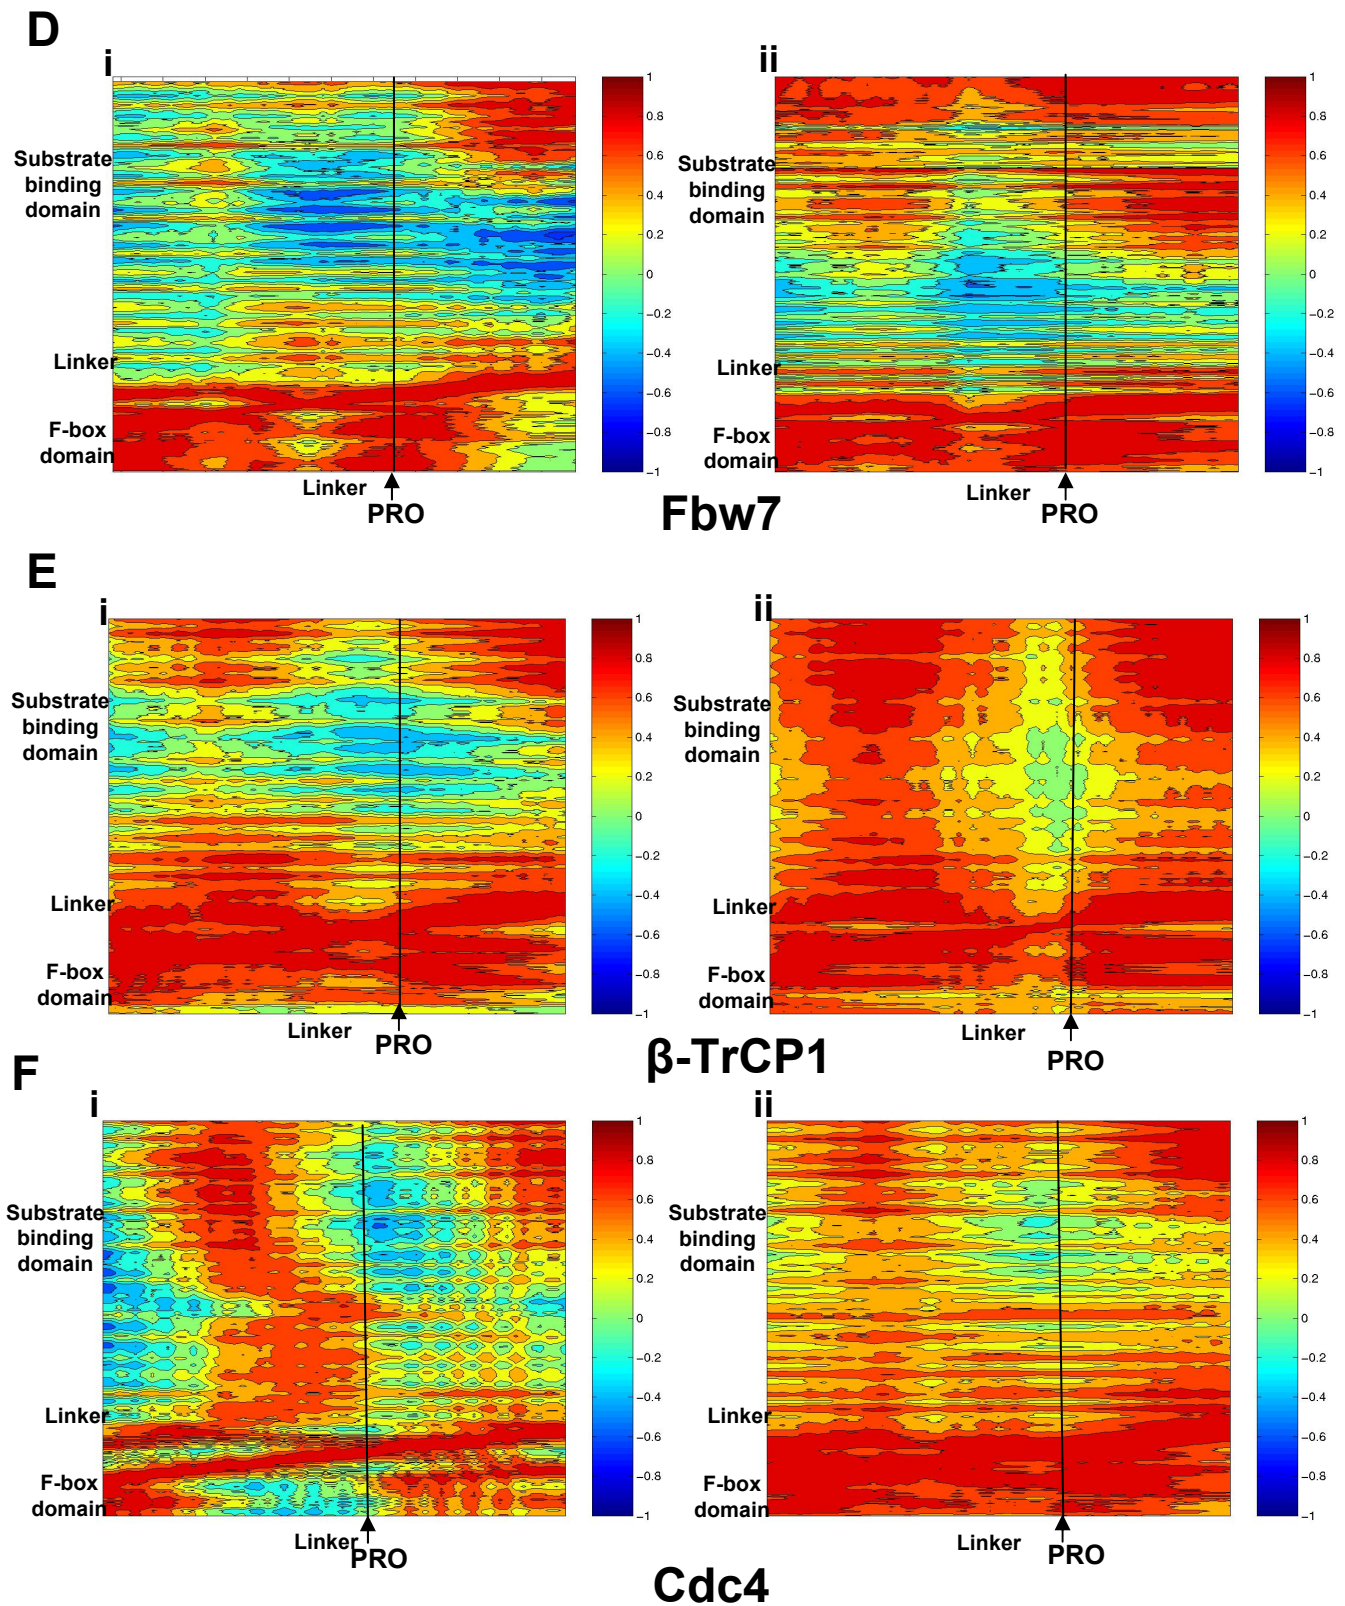

**Figure S4.** Covariance maps of (i) unbound and (ii) bound form of (A) Skp2 (B) Fbs1 (C) TIR1 (D) Fbw7 (E)  $\beta$ -TrCP1 and (F) Cdc4. The position of the proline is marked. The more red, the stronger the positive correlation; the more blue the stronger the negative (anti-) correlation. The bar provides the scale.
