# Supplementary material for: The Mechanism of Ubiquitination in the Cullin-RING E3 Ligase Machinery: Conformational Control of Substrate Orientation
Source: PubMed Central journal article supplement (PMC2741574; doi:10.1371/journal.pcbi.1000527), 2009-10-02
Supplement: pcbi.1000527.s008.pdf [file pcbi.1000527.s008.pdf]

**Table S2.** Sequence analysis of the conserved prolines. The sequences of box-domain and linker region for each protein were used as query sequences to search for matching sequences using BLAST.

|                                               | Skp2 | Fbw7 | $\beta$ -TrCP1 | Cdc4 | Fbs1 | TIR1 | pVHL | SOCS2 | SOCS4 |
|-----------------------------------------------|------|------|----------------|------|------|------|------|-------|-------|
| Percent Pro conservation <sup>a</sup>         | 63%  | 74%  | 95%            | 100% | 52%  | 78%  | 100% | 78%   | 64%   |
| No. of aligned protein sequences <sup>b</sup> | 83   | 83   | 95             | 7    | 70   | 64   | 17   | 80    | 33    |

<sup>a</sup>The percentages for the aligned proteins with conserved proline residue at the linker region.

<sup>b</sup>Total numbers of proteins assigned to the respective families and matched by BLAST. Predicted, hypothetical, and unknown proteins were excluded.
