# Supplementary material for: The Mechanism of Ubiquitination in the Cullin-RING E3 Ligase Machinery: Conformational Control of Substrate Orientation
Source: PLoS Comput Biol. 2009 Oct 2;5(10):e1000527. doi: 10.1371/journal.pcbi.1000527 (PMC2741574; doi:10.1371/journal.pcbi.1000527)
Supplement: Table S1 — Rotation angles (degrees) for nineproteins. (0.12 MB PDF) [file pcbi.1000527.s007.pdf]

**Table S1.** Rotation angles (degrees) for nine proteins.

|                      |       | Skp2 | Fbw7 | β-TrCP1 | Cdc4 | Fbs1 | TIR1 | pVHL | SOCS2 | SOCS4 |
|----------------------|-------|------|------|---------|------|------|------|------|-------|-------|
| Unbound Trajectory 1 | Max   | 53.0 | 49.4 | 53.3    | 58.0 | 35.9 | 30.6 | 80.2 | 31.2  | 35.2  |
|                      | Mean  | 28.5 | 21.9 | 21.2    | 24.5 | 17.7 | 15.3 | 37.5 | 17.9  | 15.0  |
|                      | Stdev | 8.5  | 9.0  | 10.6    | 11.7 | 6.8  | 4.3  | 19.5 | 5.0   | 7.6   |
| Unbound Trajectory 2 | Max   | 40.6 | 46.7 | 62.2    | 36.5 | 43.4 | 44.5 | 42.9 | 39.5  | 22.1  |
|                      | Mean  | 14.5 | 19.4 | 25.5    | 20.2 | 18.2 | 16.7 | 19.4 | 16.6  | 9.3   |
|                      | Stdev | 6.9  | 9.4  | 10.0    | 5.1  | 9.1  | 9.9  | 8.8  | 10.6  | 3.4   |
| bound                | Max   | 27.9 | 32.8 | 40.8    | 27.0 | 26.3 | 20.3 | 39.7 | 20.3  | 19.1  |
|                      | Mean  | 10.2 | 15.8 | 25.1    | 11.8 | 12.1 | 8.3  | 22.0 | 10.3  | 7.7   |
|                      | Stdev | 5.4  | 5.9  | 5.4     | 4.5  | 4.1  | 3.9  | 5.9  | 3.2   | 3.3   |
